# Supplementary material for: The six steps of the complete F1-ATPase rotary catalytic cycle
Source: PubMed Central journal article supplement (PMC8333055; doi:10.1038/s41467-021-25029-0), 2021-08-03
Supplement: 41467_2021_25029_MOESM1_ESM.pdf [file 41467_2021_25029_MOESM1_ESM.pdf]

## **SUPPLEMENTARY INFORMATION**

### **The six steps of the complete F<sub>1</sub>-ATPase rotary catalytic cycle**

Meghna Sobti et al.

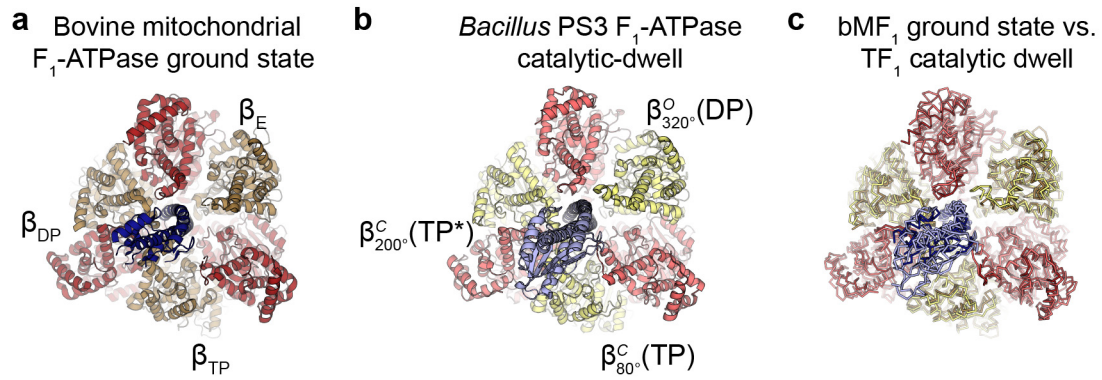

**Supplementary Figure 1: Comparison of the catalytic-dwell conformation with the bovine mitochondrial  $F_1$ -ATPase ground state.** (a) bMF<sub>1</sub> ground state crystal structure (pdb2JDI<sup>1</sup>); subunits  $\alpha$  in dark red,  $\beta$  in “sand” and  $\gamma$  in dark blue. (b) TF<sub>1</sub> catalytic-dwell cryo-EM structure (from this study); subunits  $\alpha$  in light red,  $\beta$  in light yellow and  $\gamma$  in light blue. (c) Superposition of bMF<sub>1</sub> ground state crystal structure (darker colors) with TF<sub>1</sub> catalytic-dwell cryo-EM structure (lighter colors). The structures show a similar overall fold (RMSD of 1.6 Å) in a similar rotational dwell/state.

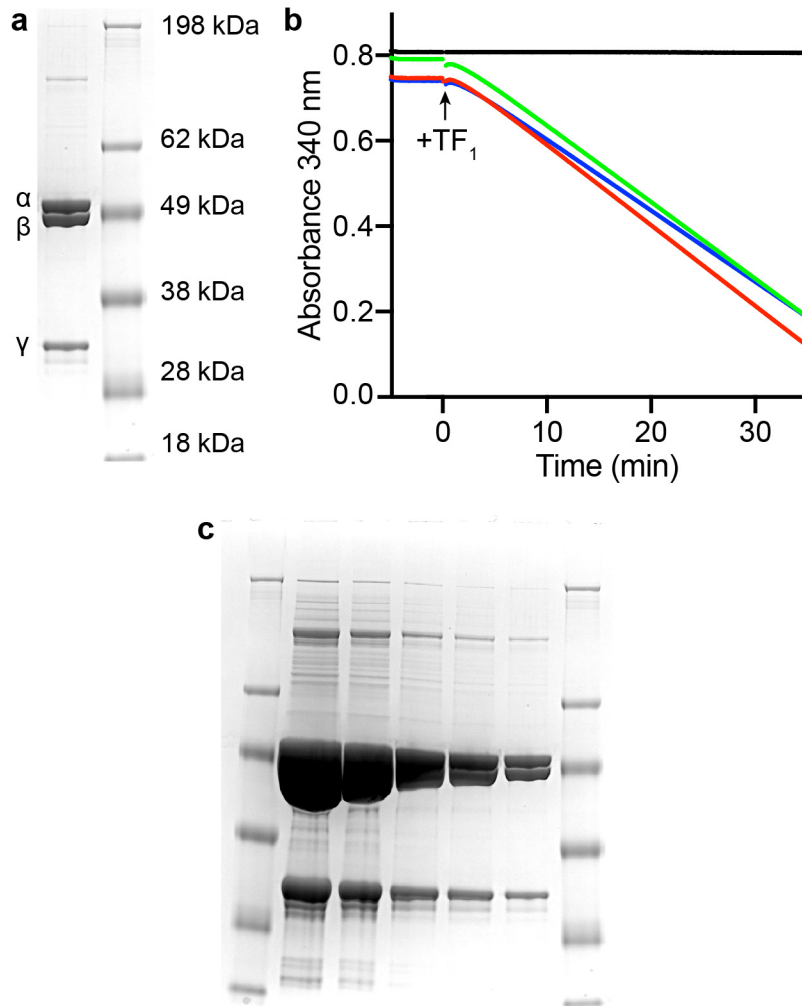

**Supplementary Figure 2: SDS PAGE and ATPase activity of TF<sub>1</sub>( $\beta$ E190D).** (a) SDS PAGE gel of purified TF<sub>1</sub>( $\beta$ E190D). *Left lane*; TF<sub>1</sub>( $\beta$ E190D). *Right lane*; SeeBlue marker (Thermo Fisher). (b) ATP regeneration assays of TF<sub>1</sub>( $\beta$ E190D) (red, green and blue) and control (black – no TF<sub>1</sub>( $\beta$ E190D) added) show that the enzyme has a steady state specific activity of 0.3 U/mg (comparable to the published value of  $\sim$ 0.4 U/mg<sup>2</sup>), where one unit of activity is defined as producing 1  $\mu$ mol of ADP per min. 10  $\mu$ g of TF<sub>1</sub>( $\beta$ E190D) added to a 1 ml reaction volume in a cuvette with 1 cm pathlength at 25°C. 6.22 Millimolar extinction coefficient of NADH at 340 nm used to calculate coupled ATP turnover. The experiment was repeated three times (red, green and blue data points) with similar results. (c) Uncropped raw image of gel in panel a.

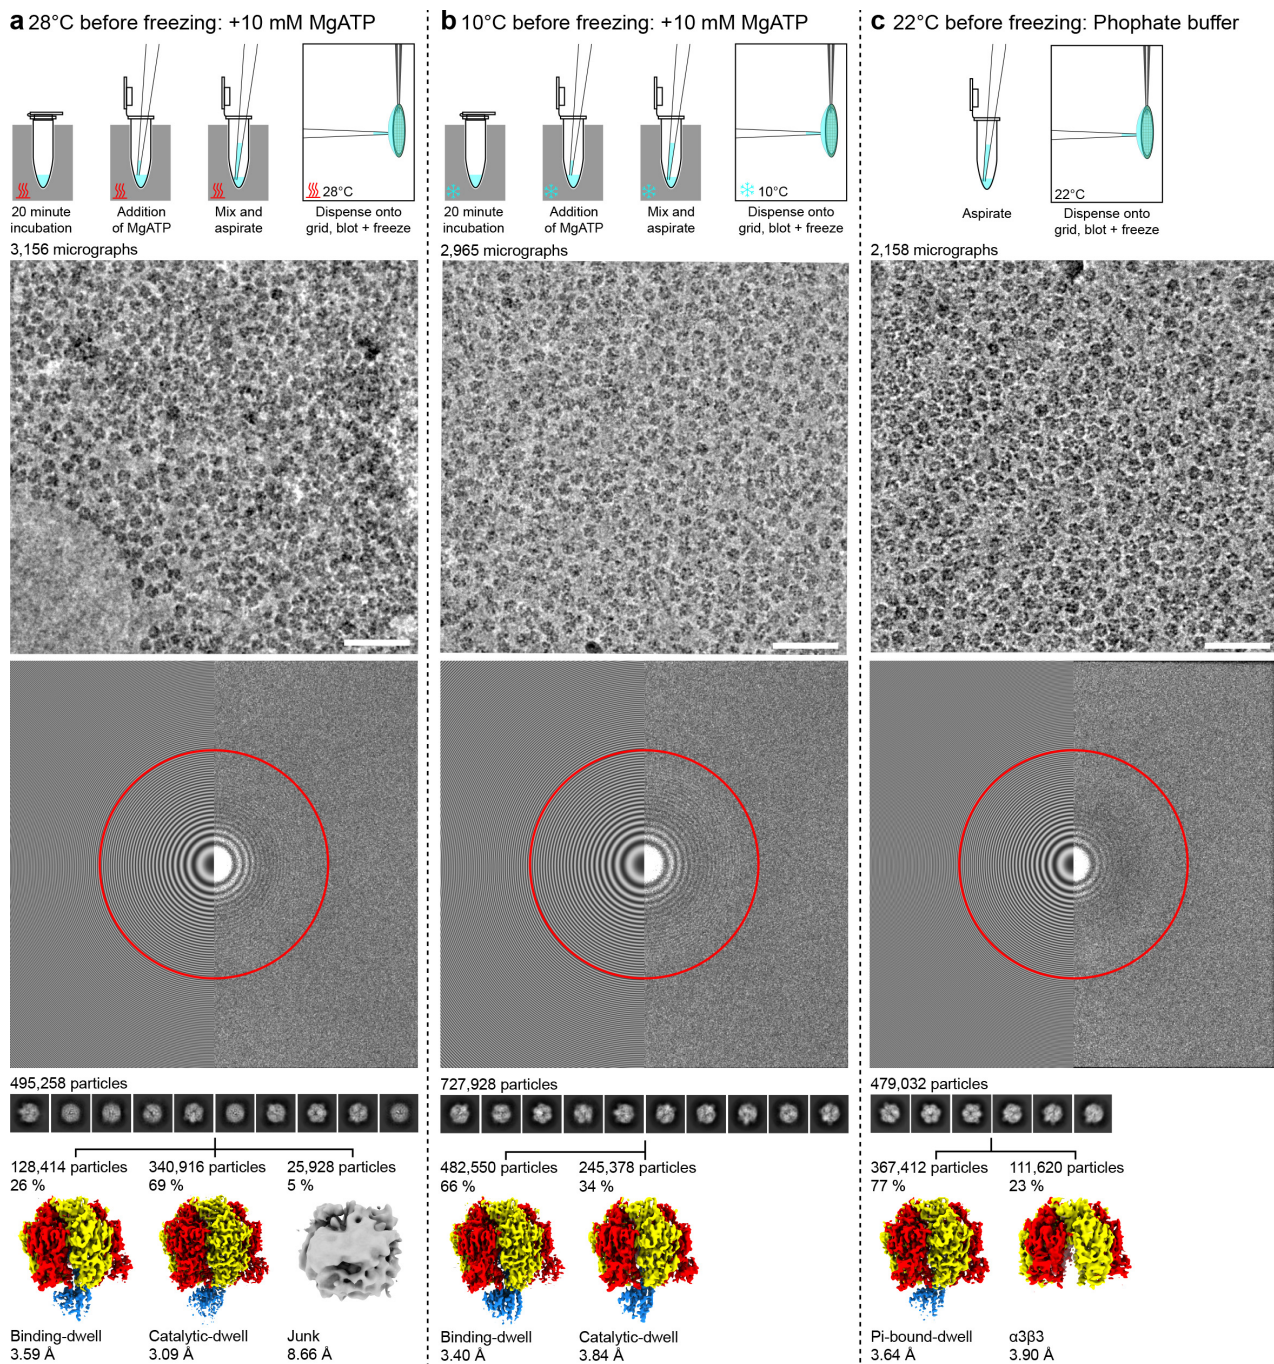

**Supplementary Figure 3: Sample preparation, data collection and data processing. (a)** 28°C + MgATP prior to plunge freezing. **(b)** 10°C + MgATP prior to plunge freezing. **(c)** 22°C in phosphate buffer prior to freezing. *Top:* schematic of sample preparation. A thermocycler was used to heat or cool the sample prior to freezing and a Vitrobot was used to control the temperature of the grid prior to plunging freezing. *Middle:* sample electron micrograph (white scale bar is equivalent to 50 nm) and power spectrum of sample (red circle at 3 Å resolution). *Bottom:* processing flowchart showing 2D classification and heterogeneous sorting<sup>3</sup>. The experiment was performed twice, once during screening at 200 kV (data not shown) and once at 300 kV (data in this figure), with similar results.



## ATP binding-dwell

①

$\beta_{0^\circ}^{HC}(TP)$

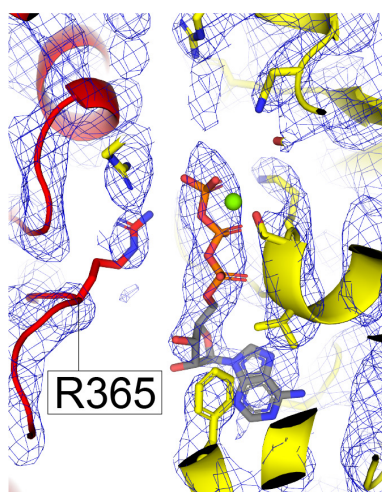

MgATP

③

$\beta_{120^\circ}^C(TP)$

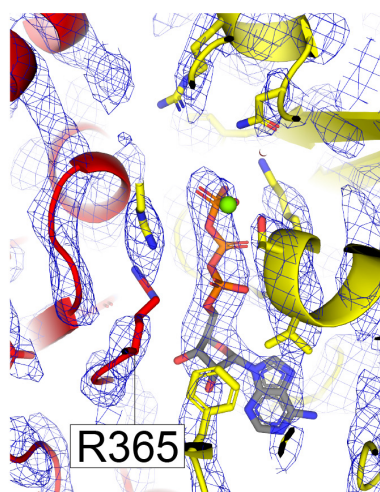

MgATP

⑤

$\beta_{240^\circ}^{HO}(DP \cdot P)$

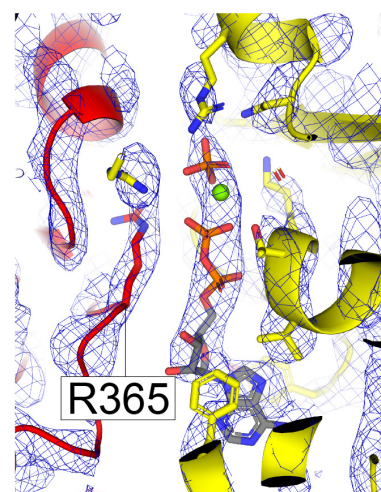

MgADP+P<sub>i</sub>

## Catalytic-dwell

②

$\beta_{80^\circ}^C(TP)$

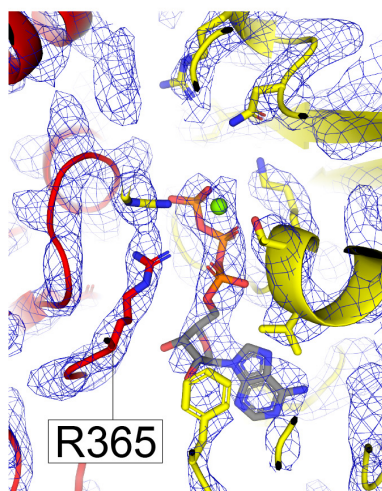

MgATP

④

$\beta_{200^\circ}^C(TP^*)$

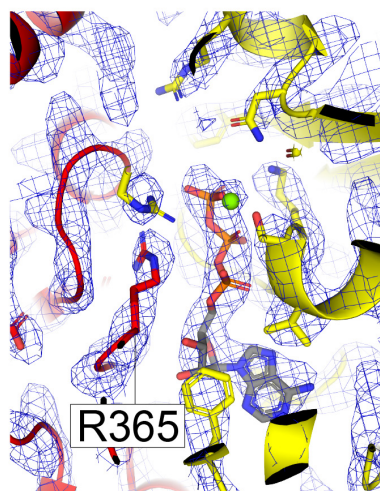

MgATP

⑥

$\beta_{320^\circ}^O(DP)$

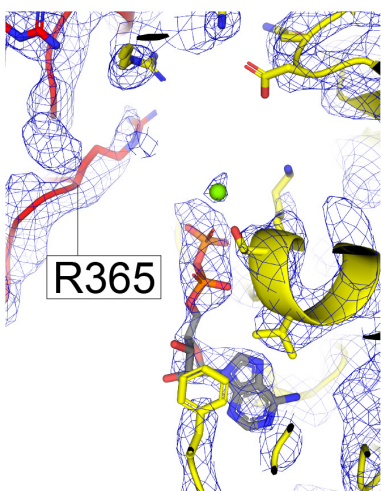

MgADP

**Supplementary Figure 4: Nucleotide binding sites.** Cryo-EM maps of the  $\beta$  subunit nucleotide binding sites. Same as Fig. 3 bottom panel, but larger format.

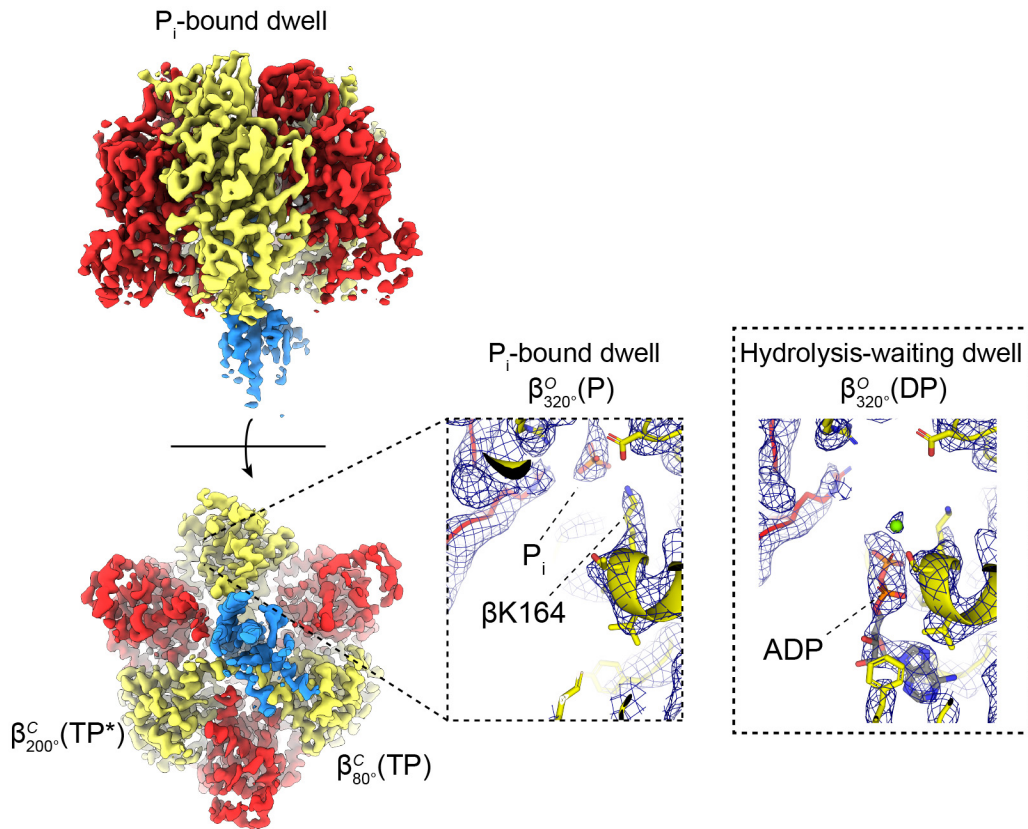

**Supplementary Figure 5: Cryo-EM structure of the P<sub>i</sub>-bound-dwell.** The P<sub>i</sub>-bound-dwell is in the same rotational state as the catalytic-dwell and contains P<sub>i</sub> in the  $\beta_{320}^O$  site. Cryo-EM map shown as surface viewed perpendicular and from the membrane. Subunits  $\alpha$  in red,  $\beta$  in yellow and  $\gamma$  blue. Views of the nucleotide binding sites of the P<sub>i</sub>-bound- and catalytic-dwells shown for comparison; cryo-EM map shown as blue mesh, and the atomic model shown as cartoon and sticks with CPK coloring (same view as bottom panel of Fig. 3).

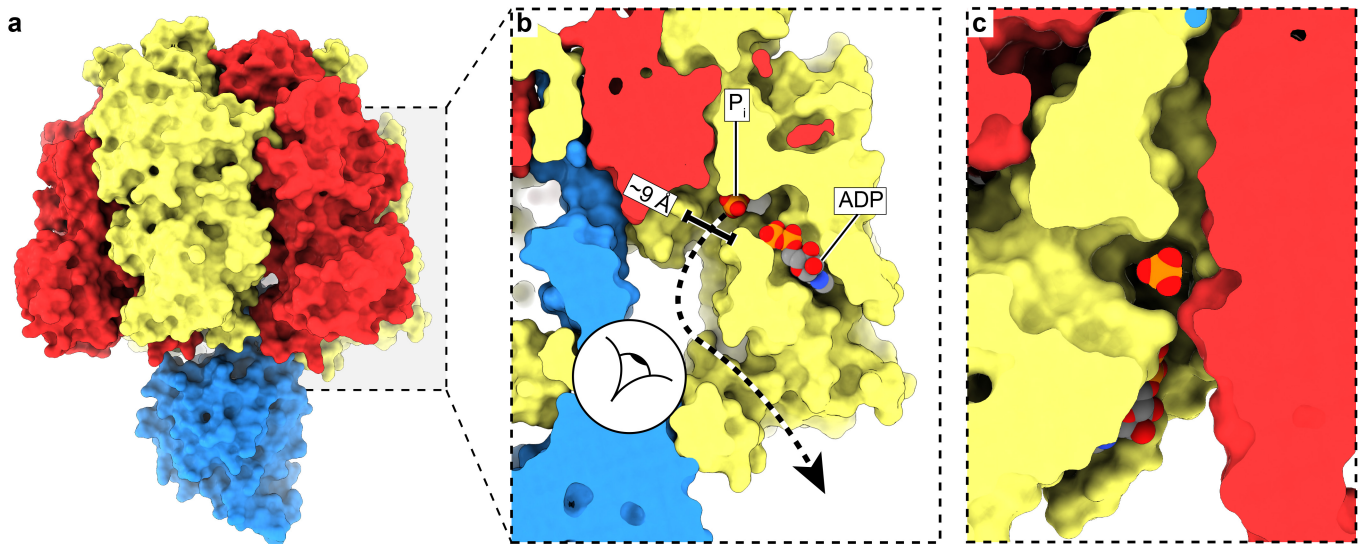

**Supplementary Figure 6: The  $P_i$  alternative exit tunnel.** Surface representation of the  $P_i$ -bound-dwell cryo-EM structure, to show the possible alternative exit tunnel. Figure is similar layout to Fig. 5. (a) Overall  $P_i$ -bound-dwell structure shown as surface. (b) Zoomed in section of the  $P_i$ -bound-dwell with the ADP molecule from the catalytic-dwell  $\beta_{320^\circ}$  site docked and shown as spheres with CPK coloring. (c) Close-up view looking down the alternative exit tunnel (viewpoint shown in panel b with eye pictogram).

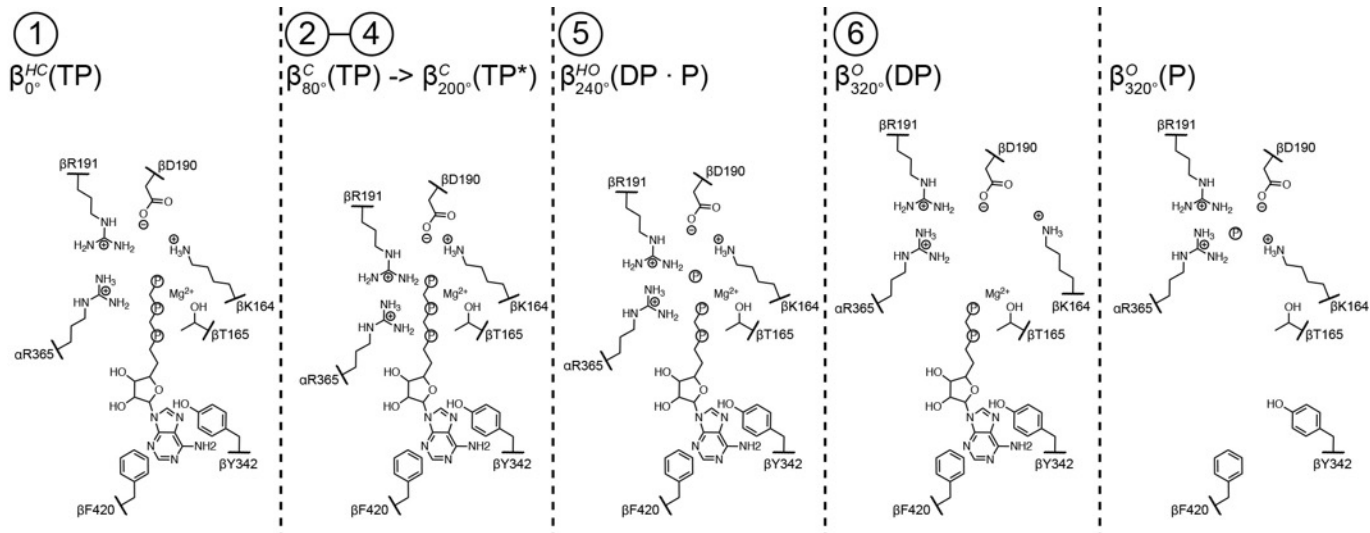

**Supplementary Figure 7: Schematics of the  $\beta$  nucleotide binding sites.** Simplified chemical representations of the catalytic binding sites, made with ChemDraw (PerkinElmer).  $\beta$ Y342 and  $\beta$ F420 hold the adenosine ring of ATP. ATP binding causes  $\alpha$ R365,  $\beta$ K164 and  $\beta$ R191 to close onto the  $\gamma$ -phosphate. ATP hydrolysis liberates the  $\gamma$ -phosphate that is coordinated by  $\alpha$ R365,  $\beta$ K164 and  $\beta$ R191. Phosphates are shown as the letter P within a circle without oxygens to aid clarity.



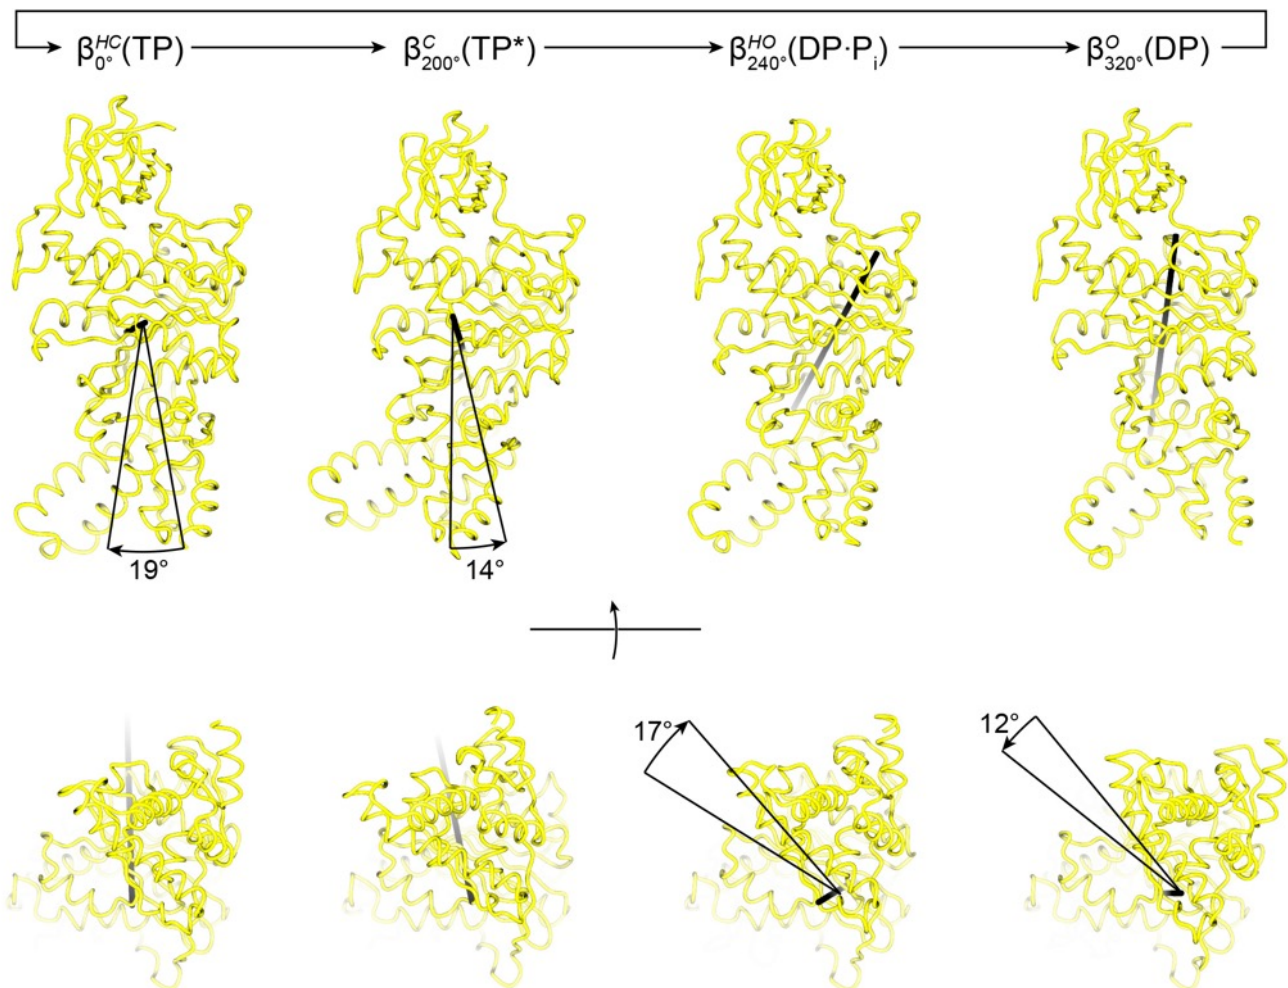

**Supplementary Figure 8: The transitions from open to closed and closed to open have two movements with different rotation axes.**  $\beta$  subunits superposed on the N-terminal  $\beta$  barrel, and rotation axes of the rigid body defined by residues 129-180 and 327-470 shown as a black vector. Rotation axes and rotations angles calculated with ccp4mg<sup>4</sup>. The angle between the rotation axes for open  $\rightarrow$  half closed and half closed  $\rightarrow$  closed is  $59^{\circ}$ . The angle between rotation axes for closed  $\rightarrow$  half open and half open  $\rightarrow$  open is  $50^{\circ}$ .

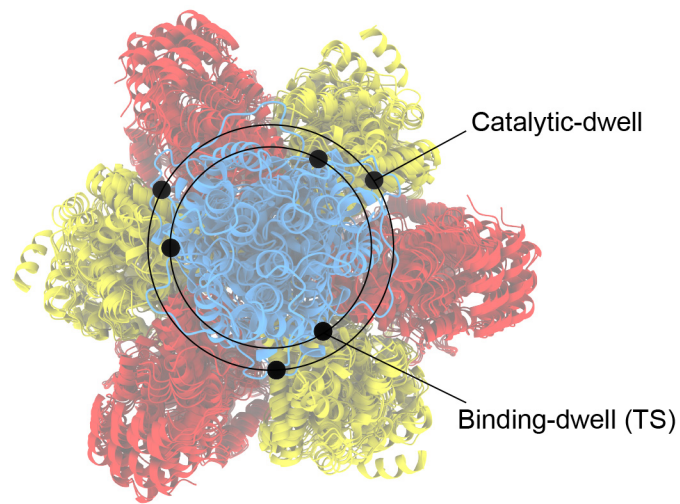

**Supplementary Figure 9: The  $\gamma$  subunit precesses or wobbles as it rotates.** Superposition of the six rotational positions (on residues  $\beta$ 2-82) of the enzyme shows that the two dwell states have different rotation radii. Protein shown as cartoon with black spheres for the C $\alpha$  of  $\gamma$ C112.

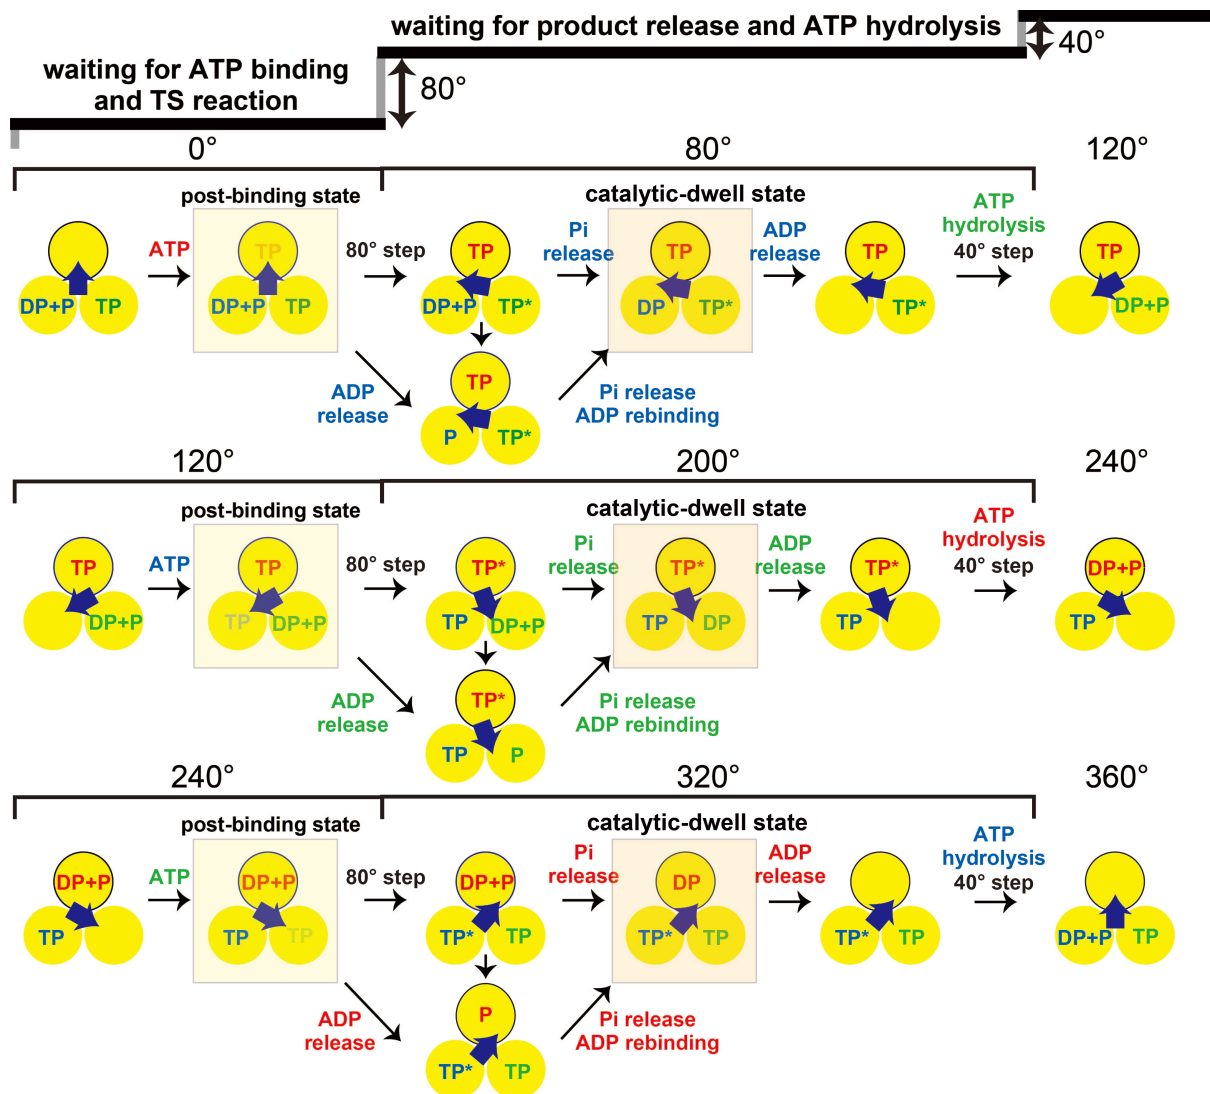

**Supplementary Figure 10: Possible models of chemo-mechanical coupling of TF<sub>1</sub> (βE190D).** Yellow circles represent the chemical states of catalytic sites in β subunits. The central blue arrows represent the orientations of γ subunits. TP, DP and P indicate ATP, ADP and P<sub>i</sub>, respectively. TP\* indicates ATP in catalysis. Green, yellow and orange squares indicate the states considered from the cryo-EM structures obtained in this study. 0° is defined as the ATP binding angle for the catalytic site outlined in black. In these models, ATP (red) bound at 0° is hydrolyzed to ADP and P<sub>i</sub> at 200°. Three possible schemes are shown for product release. (i) ADP (red) is released during the 80° substep from 240° to 320° and then P<sub>i</sub> is released at 320°. (ii) ADP (red) is released at 320° after the 80° substep from 240° to 320° and then P<sub>i</sub> is released at 320°. (iii) P<sub>i</sub> (red) is released at 320° after the 80° substep from 240° to 320° and then ADP (red) is released at 320°. Other catalytic sites also obey the same reaction scheme offset by 120° and 240°.

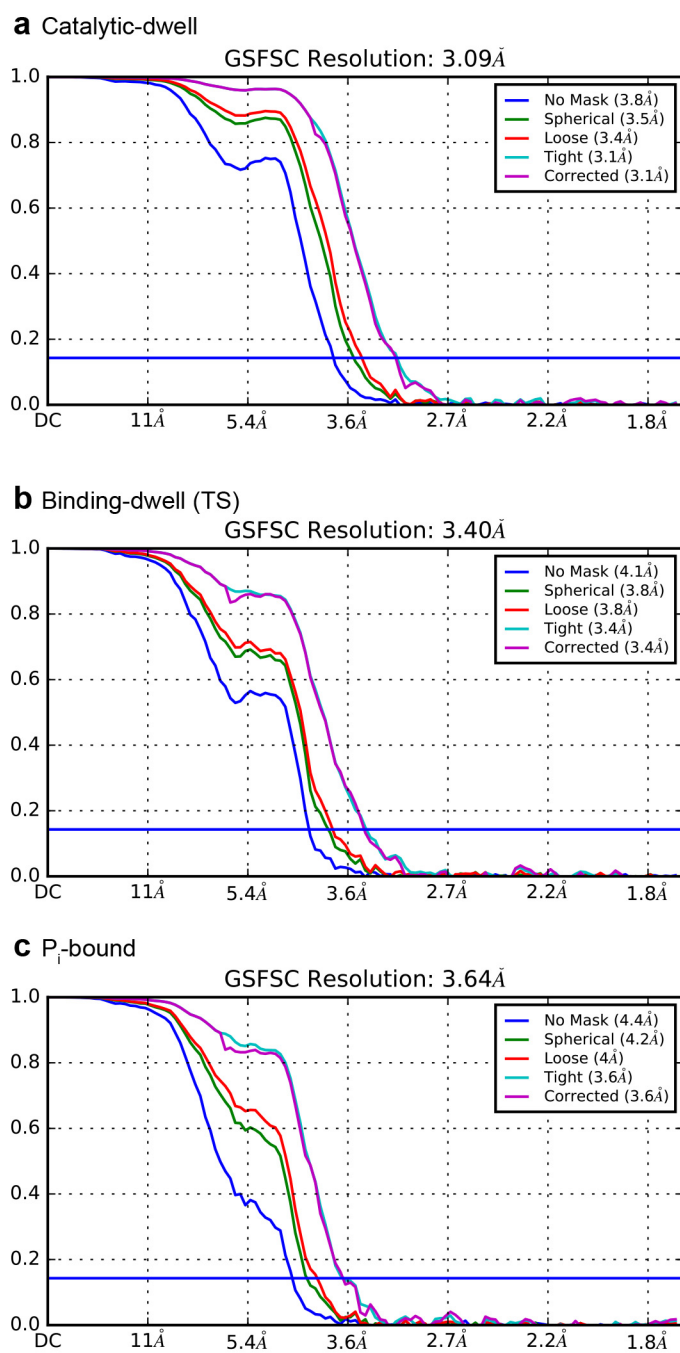

**Supplementary Figure 11: FSC curves.** FSC outputs from cryoSPARC<sup>3</sup>. (a) catalytic-dwell, (b) binding-dwell (TS) and (c) Pi-bound-dwell.



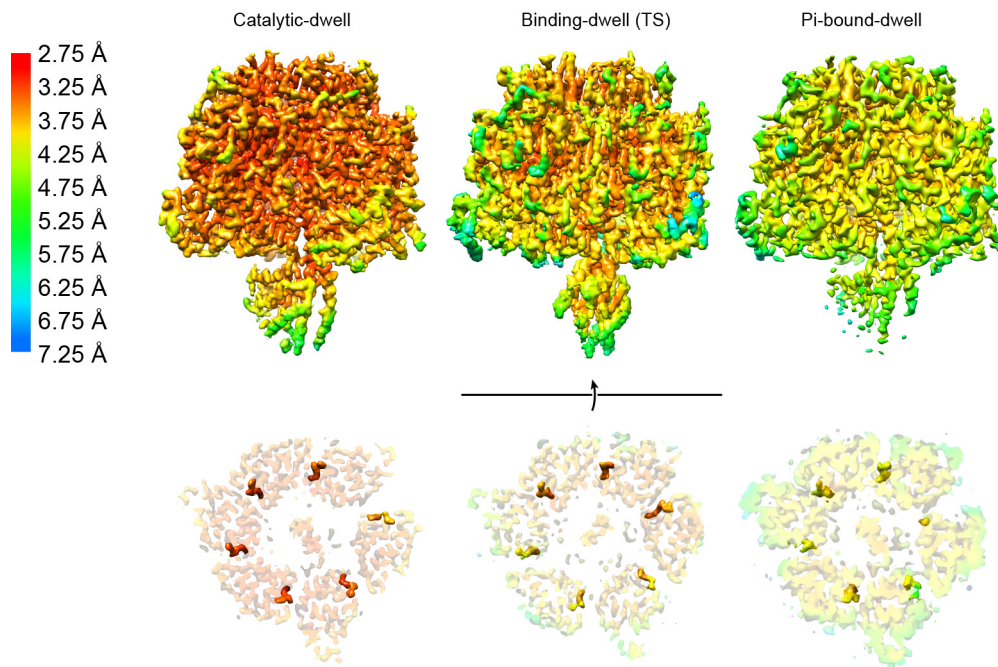

**Supplementary Figure 12: Local resolution estimates.** Cryo-EM maps colored with local resolution estimates for the catalytic-dwell, binding-dwell (TS) and Pi-bound-dwell. Implemented in cryoSPARC<sup>3</sup> and displayed using UCSF Chimera<sup>5</sup>. *Left*; color legend to describe resolution estimate. *Top*; full maps shown from the side. *Bottom*; section through TF<sub>1</sub> with the density corresponding to the nucleotides/ions highlighted.

**Supplementary Table 1: Cryo-EM data collection, refinement and validation statistics.**

|                                                     | #1 Catalytic-dwell<br>(EMDB-23116)<br>(EMDB-24139)<br>(PDB 7L1R) | #2 Binding-dwell (TS)<br>(EMDB-23115)<br>(EMDB-24138)<br>(PDB 7L1Q) | #3 Pi-bound-dwell<br>(EMDB-23117)<br>(EMDB-24140)<br>(PDB 7L1S) |
|-----------------------------------------------------|------------------------------------------------------------------|---------------------------------------------------------------------|-----------------------------------------------------------------|
| <b>Data collection and processing</b>               |                                                                  |                                                                     |                                                                 |
| Magnification                                       | 60,000                                                           | 60,000                                                              | 60,000                                                          |
| Voltage (kV)                                        | 300                                                              | 300                                                                 | 300                                                             |
| Electron exposure (e <sup>-</sup> /Å <sup>2</sup> ) | 50                                                               | 50                                                                  | 50                                                              |
| Defocus range (µm)                                  | 0.5-1.5                                                          | 0.5-1.5                                                             | 0.5-1.5                                                         |
| Pixel size (Å)                                      | 0.84                                                             | 0.84                                                                | 0.84                                                            |
| Symmetry imposed                                    | C1                                                               | C1                                                                  | C1                                                              |
| Initial particle images (no.)                       | 495,258                                                          | 727,928                                                             | 479,032                                                         |
| Final particle images (no.)                         | 340,916                                                          | 482,550                                                             | 367,412                                                         |
| Map resolution (Å)                                  | 3.1                                                              | 3.4                                                                 | 3.6                                                             |
| 0.143 FSC threshold                                 |                                                                  |                                                                     |                                                                 |
| <b>Refinement</b>                                   |                                                                  |                                                                     |                                                                 |
| Initial models used (PDB codes)                     | 6N2Y, 4XD7                                                       | #1 Catalytic-dwell                                                  | #1 Catalytic-dwell                                              |
| Model resolution (Å)                                | 3.2/3.2                                                          | 3.9/3.9                                                             | 4.0/4.3                                                         |
| 0.5 FSC threshold, masked/unmasked                  |                                                                  |                                                                     |                                                                 |
| Map sharpening <i>B</i> factor (Å <sup>2</sup> )    | 108                                                              | 115                                                                 | 146                                                             |
| Model composition                                   |                                                                  |                                                                     |                                                                 |
| Non-hydrogen atoms                                  | 24,199                                                           | 24,204                                                              | 24,176                                                          |
| Protein residues                                    | 3,118                                                            | 3,118                                                               | 3,118                                                           |
| Ligands                                             | 12                                                               | 13                                                                  | 11                                                              |
| <i>B</i> factors (Å <sup>2</sup> )                  |                                                                  |                                                                     |                                                                 |
| Protein                                             | 161                                                              | 68                                                                  | 161                                                             |
| Ligand                                              | 152                                                              | 69                                                                  | 145                                                             |
| R.m.s. deviations                                   |                                                                  |                                                                     |                                                                 |
| Bond lengths (Å)                                    | 0.012                                                            | 0.008                                                               | 0.012                                                           |
| Bond angles (°)                                     | 1.784                                                            | 1.278                                                               | 1.832                                                           |
| Validation                                          |                                                                  |                                                                     |                                                                 |
| MolProbity score                                    | 1.78                                                             | 1.63                                                                | 1.90                                                            |
| Clashscore                                          | 3.87                                                             | 2.65                                                                | 4.37                                                            |
| Poor rotamers (%)                                   | 3.32                                                             | 2.58                                                                | 4.07                                                            |
| Ramachandran plot                                   |                                                                  |                                                                     |                                                                 |
| Favored (%)                                         | 96.71                                                            | 96.13                                                               | 96.55                                                           |
| Allowed (%)                                         | 3.25                                                             | 3.70                                                                | 3.29                                                            |
| Disallowed (%)                                      | 0.03                                                             | 0.16                                                                | 0.16                                                            |

## References:

- 1 Bowler, M. W., Montgomery, M. G., Leslie, A. G. & Walker, J. E. Ground state structure of F<sub>1</sub>-ATPase from bovine heart mitochondria at 1.9 Å resolution. *J Biol Chem* **282**, 14238-14242, doi:10.1074/jbc.M700203200 (2007).
- 2 Enoki, S., Watanabe, R., Iino, R. & Noji, H. Single-molecule study on the temperature-sensitive reaction of F<sub>1</sub>-ATPase with a hybrid F<sub>1</sub> carrying a single beta(E190D). *J Biol Chem* **284**, 23169-23176, doi:10.1074/jbc.M109.026401 (2009).
- 3 Punjani, A., Rubinstein, J. L., Fleet, D. J. & Brubaker, M. A. cryoSPARC: algorithms for rapid unsupervised cryo-EM structure determination. *Nat Methods* **14**, 290-296, doi:10.1038/nmeth.4169 (2017).
- 4 McNicholas, S., Potterton, E., Wilson, K. S. & Noble, M. E. Presenting your structures: the CCP4mg molecular-graphics software. *Acta Crystallogr D Biol Crystallogr* **67**, 386-394, doi:10.1107/S0907444911007281 (2011).
- 5 Pettersen, E. F. *et al.* UCSF Chimera--a visualization system for exploratory research and analysis. *J Comput Chem* **25**, 1605-1612, doi:10.1002/jcc.20084 (2004).
